# Supplementary figures and images for: Ferroelectric-assisted charge carrier separation over Bi2MoO6 nanosheets for photocatalytic dye degradation
Source: Royal Society of Chemistry journal article supplement (doi:10.1039/d2nr02911a), 2022-01-01

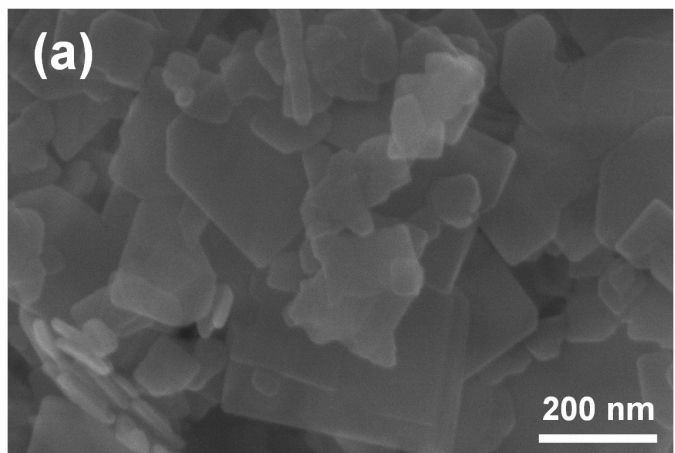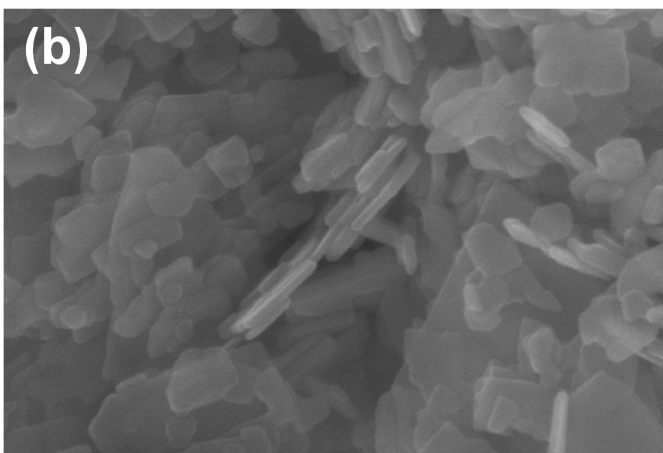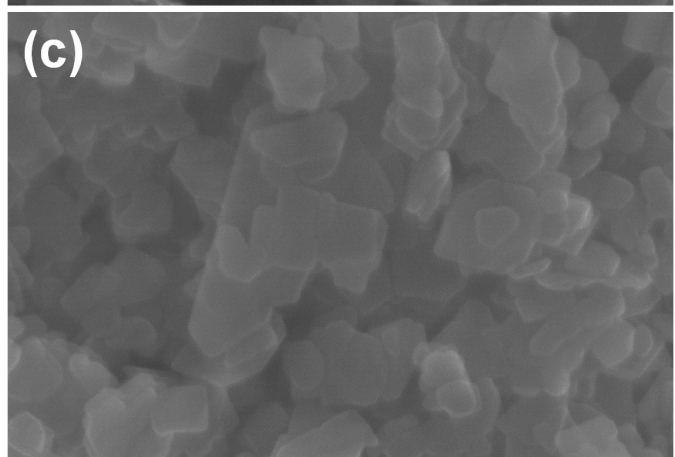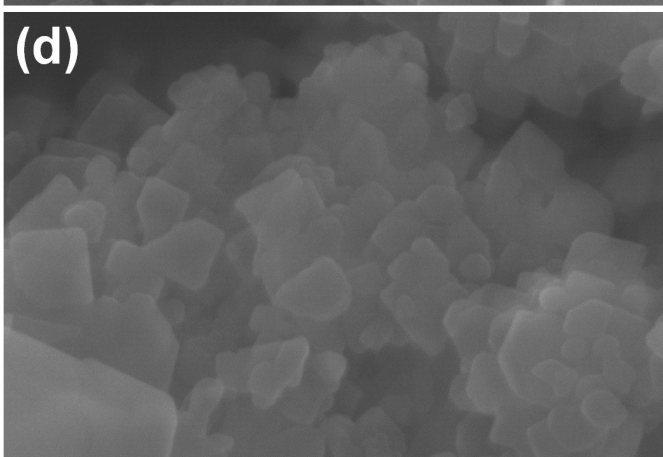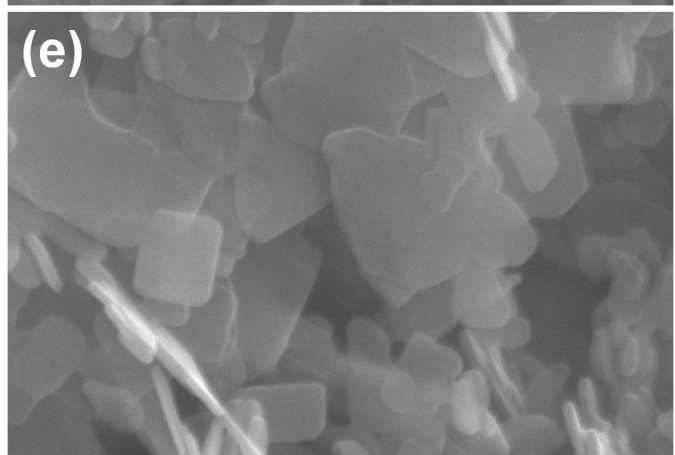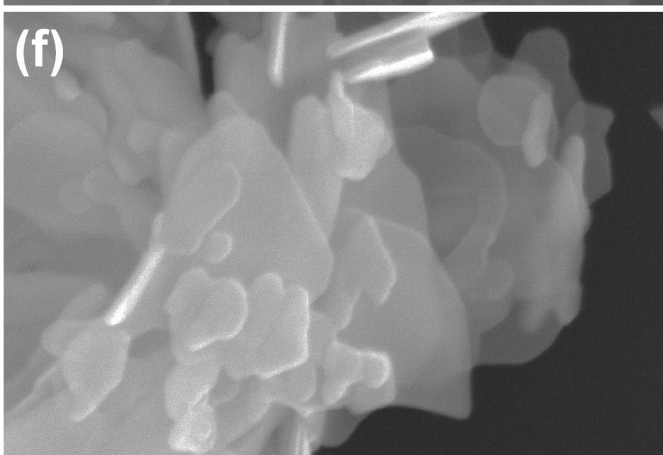

Supplement: d2nr02911a2.pdf [file d2nr02911a2.pdf]

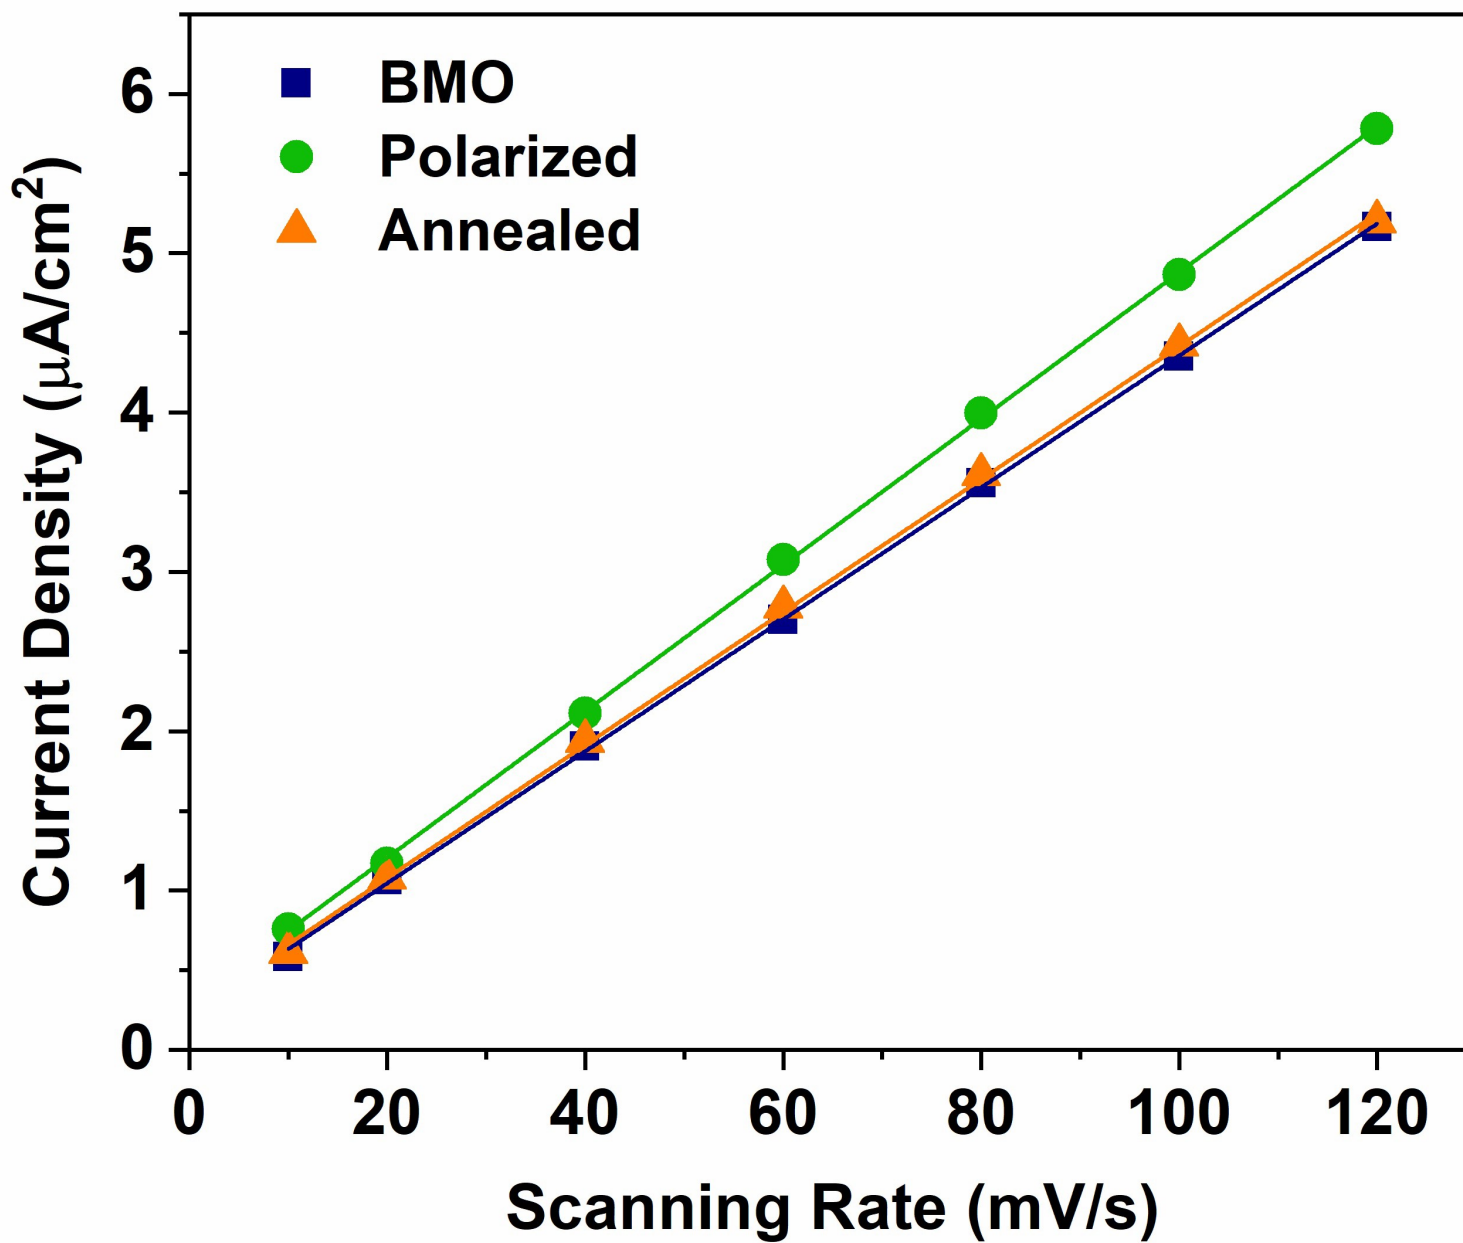

Supplement: d2nr02911a3.pdf [file d2nr02911a3.pdf]

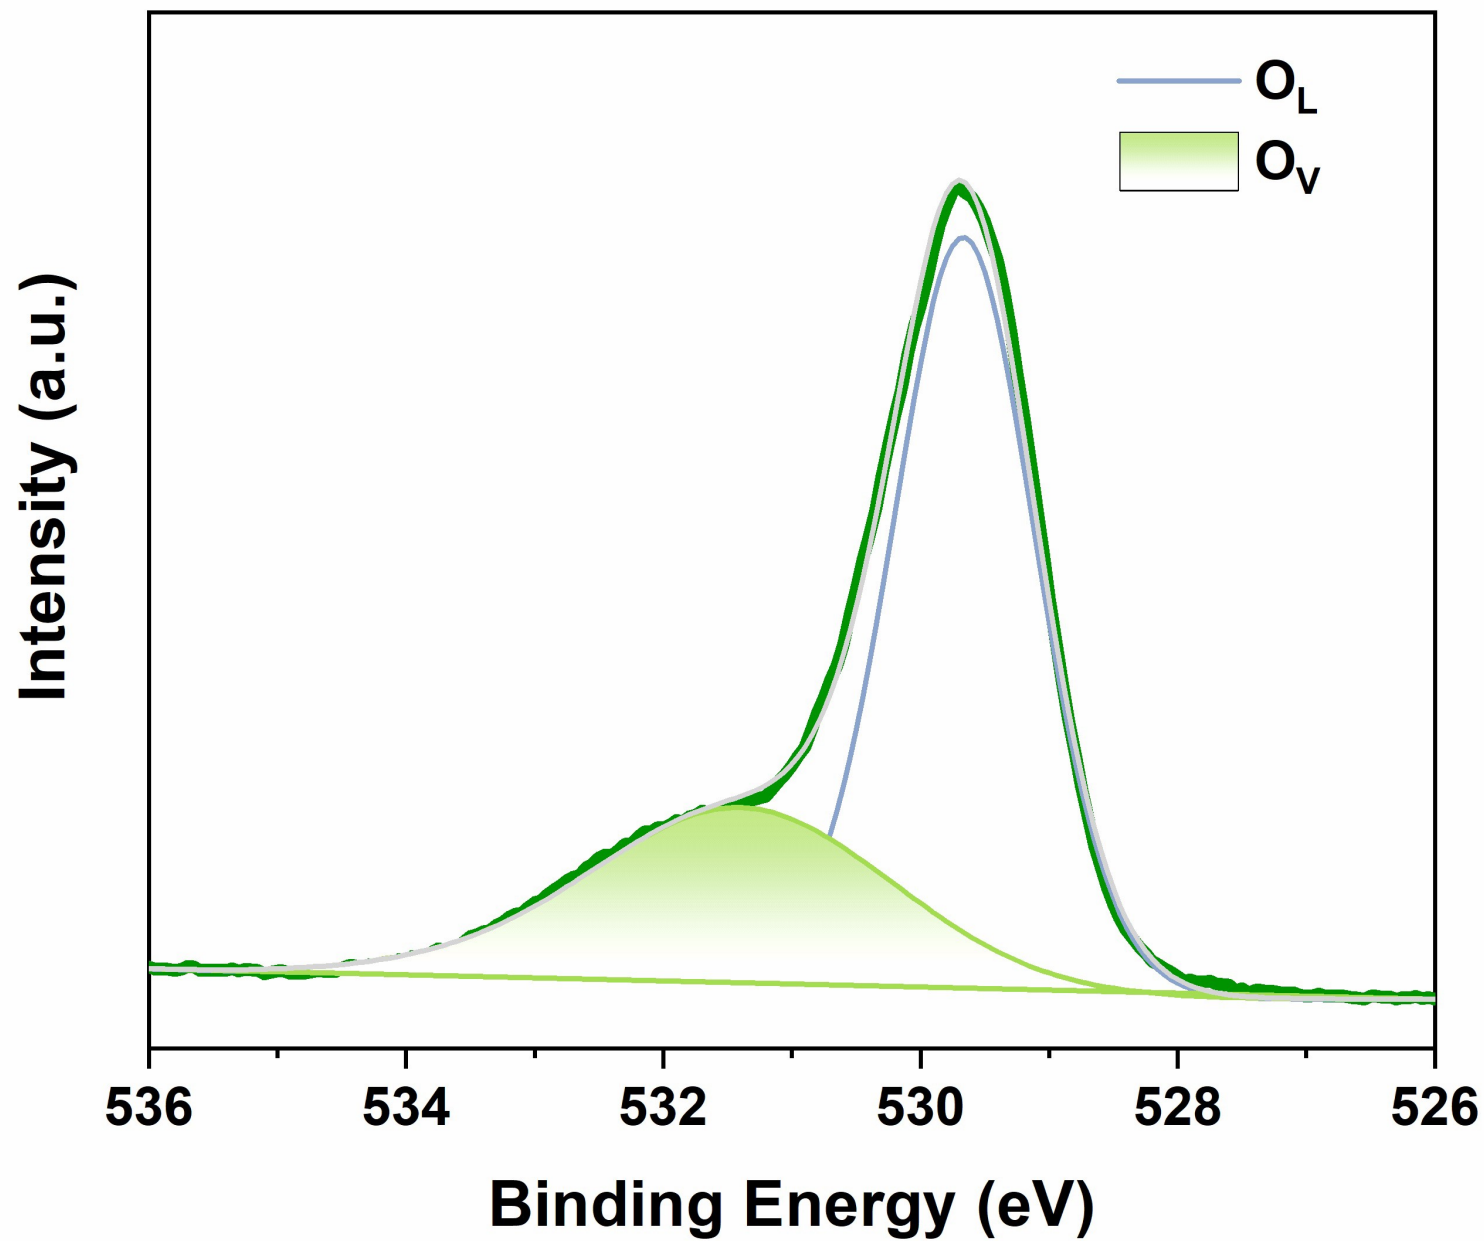

Supplement: d2nr02911a4.pdf [file d2nr02911a4.pdf]
